# Supplementary material for: COVID-19 Vaccination Safety and Tolerability in Patients Allegedly at High Risk for Immediate Hypersensitivity Reactions
Source: MDPI journal article supplement (doi:10.3390/vaccines10020286), 2022-02-14
Supplement: s1 [file s1]

## **Supplementary Materials**

**Table S1** – Overview of population invited for in-hospital vaccination for miscellaneous indications

**Table S2** – Overview of late reactions

**Table S3** – Overview of MCAS-like late reactions

**Protocol for management of immediate reactions**

**References**

**Table S1** – Overview of population invited for in-hospital vaccination for miscellaneous indications

| Subgroup                                                       | Sex | Age (y) | Triggers for previous reactions                                             | Administered vaccine | IR   | Baseline tryptase (kU/L) |
|----------------------------------------------------------------|-----|---------|-----------------------------------------------------------------------------|----------------------|------|--------------------------|
| <b>History of reactions to non-COVID-19 vaccines</b><br>n = 12 | F   | 62      | influenza vaccine <sup>+</sup>                                              | BNT162b2             | nsIR | 6,2                      |
|                                                                | F   | 49      | influenza vaccine <sup>+</sup>                                              | BNT162b2             | -    | -                        |
|                                                                | F   | 72      | influenza vaccine                                                           | Ad26.COV2-S          | nsIR | -                        |
|                                                                | F   | 47      | influenza vaccine <sup>+</sup> , wasp venom                                 | BNT162b2             | nsIR | 2,4                      |
|                                                                | F   | 64      | influenza vaccine (Pandemrix) <sup>+</sup>                                  | BNT162b2             | -    | -                        |
|                                                                | F   | 67      | influenza vaccine (Pandemrix), pneumococcal vaccine (Prevenar) <sup>+</sup> | BNT162b2             | -    | -                        |
|                                                                | F   | 42      | influenza vaccine, multiple other drugs                                     | BNT162b2             | -    | -                        |
|                                                                | F   | 59      | pneumococcal vaccine (Pneumovax)                                            | Ad26.COV2-S          | -    | 1,5                      |
|                                                                | F   | 63      | multiple vaccines, multiple drugs                                           | Ad26.COV2-S          | -    | 3,1                      |
|                                                                | F   | 64      | multiple vaccines, multiple drugs <sup>+</sup>                              | Ad26.COV2-S          | -    | -                        |
|                                                                | M   | 34      | tetanus vaccine, meningococcal vaccine <sup>+</sup>                         | BNT162b2             | -    | -                        |
|                                                                | M   | 42      | unknown vaccine                                                             | Ad26.COV2-S          | -    | 7,3                      |
| <b>Skin test confirmed PEG allergy</b><br>n = 11               | F   | 55      | ibuprofen (PEG400) <sup>#</sup>                                             | Ad26.COV2-S          | -    | 3,1                      |
|                                                                | F   | 51      | BNT162b2 (PEG2200)                                                          | Ad26.COV2-S          | nsIR | 5,7                      |
|                                                                | F   | 21      | Depomedrol (PEG3350) <sup>#</sup>                                           | Ad26.COV2-S          | -    | 3,3                      |
|                                                                | F   | 69      | Depomedrol (PEG3350) <sup>#</sup>                                           | Ad26.COV2-S          | -    | 8,2                      |
|                                                                | F   | 60      | Depomedrol, Moviprep (PEG3350) <sup>#</sup>                                 | Ad26.COV2-S          | -    | -                        |
|                                                                | F   | 60      | Kleanprep (PEG3350) <sup>#</sup>                                            | Ad26.COV2-S          | -    | -                        |
|                                                                | F   | 73      | Forlax (PEG4000) <sup>#</sup>                                               | Ad26.COV2-S          | -    | 8,5                      |
|                                                                | M   | 53      | Depomedrol (PEG3350) <sup>#</sup>                                           | Ad26.COV2-S          | -    | 4,4                      |
|                                                                | M   | 39      | Depomedrol (PEG3350) <sup>#</sup>                                           | Ad26.COV2-S          | -    | 6,3                      |
|                                                                | M   | 56      | Diprophos (PEG3350) <sup>#</sup>                                            | Ad26.COV2-S          | -    | 4,8                      |
|                                                                | M   | 67      | Proflox (PEG4000) <sup>#</sup>                                              | Ad26.COV2-S          | -    | 4,2                      |
|                                                                | F   | 27      | ChAdOx2                                                                     | BNT162b2             | nsIR | 1,7                      |

|                                                                     |   |    |                                                                            |             |      |       |
|---------------------------------------------------------------------|---|----|----------------------------------------------------------------------------|-------------|------|-------|
| <b>History of reactions to first COVID-19 vaccine dose</b><br>n = 9 | F | 32 | ChAdOx2 <sup>+</sup>                                                       | BNT162b2    | nsIR | 4,7   |
|                                                                     | F | 43 | ChAdOx2 <sup>+</sup>                                                       | BNT162b2    | nsIR | -     |
|                                                                     | F | 51 | ChAdOx2 <sup>+</sup>                                                       | BNT162b2    | -    | 5,8   |
|                                                                     | F | 48 | ChAdOx2 <sup>+</sup>                                                       | BNT162b2    | -    | 6,1   |
|                                                                     | F | 73 | BNT162b2 <sup>+</sup>                                                      | BNT162b2    | -    | -     |
|                                                                     | F | 40 | BNT162b2 <sup>+</sup>                                                      | BNT162b2    | -    | -     |
|                                                                     | F | 44 | BNT162b2 <sup>+</sup>                                                      | BNT162b2    | -    | -     |
|                                                                     | F | 65 | BNT162b2 <sup>+</sup>                                                      | BNT162b2    | -    | 5,9   |
| <b>Other</b><br>n = 16                                              | F | 58 | PEG-containing drug (Aethoxysklerol) <sup>+</sup>                          | Ad26.COV2-S | -    | 5,9   |
|                                                                     | F | 50 | PEG-containing drug (Depo-Medrol) <sup>+</sup>                             | Ad26.COV2-S | -    | 4,7   |
|                                                                     | F | 52 | PEG-containing drug (Diprophos) <sup>+</sup>                               | Ad26.COV2-S | -    | -     |
|                                                                     | F | 60 | multiple drugs <sup>+</sup>                                                | Ad26.COV2-S | nsIR | 3,6   |
|                                                                     | F | 73 | multiple drugs                                                             | Ad26.COV2-S | -    | 3,6   |
|                                                                     | F | 65 | multiple drugs <sup>+</sup>                                                | Ad26.COV2-S | -    | 4,5   |
|                                                                     | F | 76 | multiple drugs                                                             | Ad26.COV2-S | nsIR | -     |
|                                                                     | F | 26 | anaphylaxis-like reaction to single unknown trigger                        | BNT162b2    | -    | 3,0   |
|                                                                     | F | 50 | anaphylaxis-like reaction to single unknown trigger                        | Ad26.COV2-S | -    | 4,8   |
|                                                                     | F | 37 | possible hereditary angioedema (evaluation ongoing at time of vaccination) | BNT162b2    | nsIR | -     |
|                                                                     | F | 22 | complex primary food allergy                                               | BNT162b2    | -    | 5,6   |
|                                                                     | M | 48 | PS80-containing drug (unspecified) <sup>+</sup>                            | BNT162b2    | -    | -     |
|                                                                     | M | 71 | PEG-containing drug (Depo-Medrol) <sup>+</sup>                             | Ad26.COV2-S | -    | 7,2   |
|                                                                     | M | 47 | anaphylaxis to PEG-containing drug (Diprophos) <sup>§</sup>                | Ad26.COV2-S | -    | -     |
|                                                                     | M | 49 | anaphylaxis-like reaction to single unknown trigger                        | Ad26.COV2-S | -    | 4,8   |
|                                                                     | M | 69 | anaphylaxis-like reaction to single unknown trigger                        | Ad26.COV2-S | -    | 20,9* |

Abbreviations: IR, immediate reaction; F, female; M, male; PEG, polyethylene glycol; PS80, polysorbate 80; nsIR, non-severe immediate reaction

+ negative skin tests for PEG and PS80

§ index reaction was anaphylaxis after Diprophos IM; negative skin testing for PEG and PS80 (excipients), positive for bethamethasone dipropionate (active ingredient)

# previously described in Ieven *et al.*<sup>1</sup>

\* c-KIT D816V mutation was negative

**Table S2** – Overview of late reactions

| Characteristic      |                 | No. (%)        |              |              |            |               |
|---------------------|-----------------|----------------|--------------|--------------|------------|---------------|
| Diagnostic category |                 | Total          | pMCD         | IA           | HAE        | Miscellaneous |
| Follow-up response  |                 | 135/196 (68.9) | 76/99 (76.8) | 30/39 (79.9) | 7/10 (70)  | 22/48 (45.8)  |
| Late reaction       |                 |                |              |              |            |               |
|                     | Overall         | 57/135 (42.2)  | 36/76 (47.4) | 13/30 (43.3) | 2/7 (28.6) | 12/22 (54.5)  |
|                     | Vaccine-related | -              | 30/76 (39.5) | -            | -          | -             |
|                     | MCAS-like       | -              | 10/76 (13.2) | -            | -          | -             |

Abbreviations: pMCD, primary mast cell disease; IA, idiopathic anaphylaxis; HAE, hereditary angioedema; MCAS, mast cell activation symptoms

**Table S3** - Overview of MCAS-like late reactions

| Diagnosis | Sex | Age | Baseline tryptase (kU/L) | Vaccine     | MCAS-like LR symptoms | Other LR symptoms        | Prior MCAS symptoms                          | Onset      | Duration   | Management    |
|-----------|-----|-----|--------------------------|-------------|-----------------------|--------------------------|----------------------------------------------|------------|------------|---------------|
| ISM       | F   | 63  | 45                       | Ad26.COV2-S | cutaneous             |                          | cutaneous                                    | > 24 hours | < 72 hours | H1, LTRA      |
| ISM       | F   | 56  | 48,3                     | Ad26.COV2-S | gastro-intestinal     |                          | gastro-intestinal, cardiovascular            | > 12 hours | < 72 hours | H1            |
| ISM       | F   | 65  | 71,9                     | Ad26.COV2-S | gastro-intestinal     |                          | cutaneous, gastro-intestinal                 | > 24 hours | < 72 hours | oral cromolyn |
| ISM       | F   | 50  | 70                       | Ad26.COV2-S | cutaneous             |                          | cutaneous, constitutional                    | < 6 hours  | < 6 hours  | -             |
| ISM       | F   | 57  | 168                      | Ad26.COV2-S | cutaneous             |                          | cutaneous, cardiovascular, gastro-intestinal | > 24 hours | < 72 hours | -             |
| ASM       | F   | 63  | > 200                    | Ad26.COV2-S | constitutional        |                          | constitutional, cardiovascular               | < 6 hours  | < 24 hours | H1            |
| pMCAS     | M   | 53  | 21,4                     | Ad26.COV2-S | cardiovascular        | Fatigue, myalgia         | cardiovascular, gastro-intestinal            | > 6 hours  | < 24 hours | -             |
| ISM       | M   | 36  | 19,4                     | BNT162b2    | cardiovascular        | fatigue, headache        | cardiovascular                               | > 6 hours  | < 24 hours | -             |
| ISM       | F   | 54  | 7,3                      | Ad26.COV2-S | cardiovascular        | fatigue, headache, fever | cardiovascular                               | < 6 hours  | < 48 hours | -             |
| CM        | F   | 35  | 14,7                     | BNT162b2    | gastro-intestinal     |                          | cutaneous, gastro-intestinal                 | > 12 hours | < 24 hours | -             |

Abbreviations: MCAS, mast cell activation symptoms; ISM, indolent systemic mastocytosis; ASM, aggressive systemic mastocytosis; pMCAS, primary mast cell activation syndrome; CM, cutaneous mastocytosis; H1, H1-anthistamine

Gastro-intestinal MCAS: diarrhoea, abdominal cramping, dyspepsia

Cardiovascular MCAS: flushing, palpitations, dizziness/presyncope

Cutaneous MCAS: increased whealing, erythema and pruritus of existing lesions

Constitutional MCAS: general malaise, fever, myalgia

## Protocol for management of immediate reactions

The protocol for the management of immediate vaccine reactions was outlined in a preapproved internal standard operating procedure (SOP) document generated prior to initiation of the in-hospital vaccination of alleged high-allergy risk patients.

In brief:

- All nursing staff were instructed in the recognition of early mild and major signs of anaphylaxis as well as the most important differential diagnoses (including vagal syncope and hyperventilation), prior to initiation of the vaccination protocol.
- Upon patient admission to the vaccination unit, baseline vital signs were checked and registered and IV access was obtained.
- Nursing staff were present in close proximity to the patients during a mandatory 30-minute post-vaccination observation window. If a patient reported any symptoms, nurses were instructed to immediately inform the supervising allergist(s) and proceed to check patient blood pressure and oxygen saturation.
- The supervising allergist(s) would perform a clinical evaluation of the patient.
- Based on these findings, the evaluating allergist(s) would decide whether to administer rescue medication and whether to transfer the patient to a separate on-site observation room with facilities for supplemental oxygen administration and continuous heart rhythm monitoring.
- In case of a severe reaction with respiratory and/or hemodynamic compromise, basic life support would be initiated and a code would be called to summon the internal medical response unit from the emergency department to performed advanced life support if required.
- Stable patients who were deemed to require prolonged monitoring (i.e. those with potentially severe initial symptoms, deemed to be at particular risk for a more severe reaction or with slow and/or incomplete resolution of symptoms after 1-2 hours of on-site observation) were transferred to the emergency department for prolonged monitoring (6 hours).

## References

1. Ieven T, Van Weyenbergh T, Vandebotermiet M, et al. Tolerability of polysorbate 80-containing COVID-19 vaccines in confirmed polyethylene glycol-allergic patients. *J Allergy Clin Immunol Pract.* 2021 Oct 6;S2213-2198(21)01106-5. doi: 10.1016/j.jaip.2021.09.039.
